# Supplementary material for: Clinical outcome of Mantle Cell Lymphoma patients with high-risk disease (high-risk MIPI-c or high p53 expression)
Source: Springer Nature journal article supplement (doi:10.1038/s41375-023-01977-y), 2023-07-26
Supplement: MOESM1 [file 41375_2023_1977_MOESM1_ESM.pdf]

# Supplement

## Supplemental Tables

**Supplemental Table 1: Demographic and clinical characteristics of MCL0208 patients at enrolment with available data for Ki-67 or TP53 mutation or del17(p)**

| Factor                                | Level             | All         | Low-risk disease | High-risk disease |
|---------------------------------------|-------------------|-------------|------------------|-------------------|
| <b>N</b>                              |                   | 230         | 176              | 54                |
| <b>Age at enrolment, median (IQR)</b> |                   | 57 (52, 62) | 57 (50, 62)      | 59 (54, 61)       |
| <b>Sex</b>                            | Female            | 52 (22.6%)  | 39 (22.2%)       | 13 (24.1%)        |
|                                       | Male              | 178 (77.4%) | 137 (77.8%)      | 41 (75.9%)        |
| <b>Abnormal LDH</b>                   |                   | 74 (32.2%)  | 44 (25.0%)       | 30 (55.6%)        |
| <b>ECOG</b>                           | 0                 | 181 (78.7%) | 145 (82.4%)      | 36 (66.7%)        |
|                                       | 1                 | 41 (17.8%)  | 26 (14.8%)       | 15 (27.8%)        |
|                                       | 2                 | 8 (3.5%)    | 5 (2.8%)         | 3 (5.6%)          |
| <b>Stage</b>                          | II                | 2 (0.9%)    | 2 (1.1%)         | 0 (0.0%)          |
|                                       | III               | 12 (5.2%)   | 8 (4.5%)         | 4 (7.4%)          |
|                                       | IV                | 216 (93.9%) | 166 (94.3%)      | 50 (92.6%)        |
| <b>Bulky disease (5 cm)</b>           | NO                | 147 (63.9%) | 120 (68.2%)      | 27 (50.0%)        |
|                                       | YES               | 83 (36.1%)  | 56 (31.8%)       | 27 (50.0%)        |
| <b>Bone marrow involvement</b>        |                   | 185 (80.4%) | 139 (79.0%)      | 46 (85.2%)        |
| <b>MIPI Risk Group</b>                | Low               | 140 (60.9%) | 122 (69.3%)      | 18 (33.3%)        |
|                                       | Intermediate      | 58 (25.2%)  | 47 (26.7%)       | 11 (20.4%)        |
|                                       | High              | 32 (13.9%)  | 7 (4.0%)         | 25 (46.3%)        |
| <b>MIPI-c Risk Group</b>              | Low               | 111 (48.3%) | 99 (56.3%)       | 12 (22.2%)        |
|                                       | Low-Intermediate  | 64 (27.8%)  | 54 (30.7%)       | 10 (18.5%)        |
|                                       | Intermediate-High | 30 (13.0%)  | 23 (13.1%)       | 7 (13.0%)         |
|                                       | High              | 23 (10.0%)  | 0 (0.0%)         | 23 (42.6%)        |
|                                       | Missing           | 2 (0.9%)    | 0 (0.0%)         | 2 (3.7%)          |
| <b>Ki67 index &gt;30%</b>             |                   | 75 (32.9%)  | 39 (22.2%)       | 36 (69.2%)        |
| <b>TP53mut or del(17p)</b>            |                   | 38 (17.0%)  | 0 (0.0%)         | 38 (80.9%)        |

**Supplemental Table 2: Demographic and clinical characteristics of MCL4 patients at enrolment with available data for Ki-67 or TP53 mutation**

| Factor                                | Level  | All         | Low-risk disease | High-risk disease |
|---------------------------------------|--------|-------------|------------------|-------------------|
| <b>N</b>                              |        | 46          | 36               | 10                |
| <b>Age at enrolment, median (IQR)</b> |        | 72 (70, 77) | 72 (70, 78)      | 72 (70, 76)       |
| <b>Sex</b>                            | Female | 12 (26.1%)  | 8 (22.2%)        | 4 (40%)           |
|                                       | Male   | 34 (73.9%)  | 28 (77.8%)       | 6 (60%)           |
| <b>Abnormal LDH</b>                   |        | 18 (39.1%)  | 12 (33.3%)       | 6 (60%)           |
| <b>ECOG</b>                           | 0      | 21 (45.7%)  | 17 (47.2%)       | 4 (40%)           |
|                                       | 1      | 22 (47.8%)  | 18 (50%)         | 4 (40%)           |
|                                       | 2      | 3 (6.5%)    | 1 (2.8%)         | 2 (20%)           |

|                                |                   |            |            |           |
|--------------------------------|-------------------|------------|------------|-----------|
| <b>Stage</b>                   | II                | 2 (4.3 %)  | 2 (5.6%)   | 0         |
|                                | III               | 4 (8.7%)   | 4 (11.1%)  | 0         |
|                                | IV                | 40 (87%)   | 30 (83.3%) | 10 (100%) |
| <b>Bulky disease (5 cm)</b>    | NO                | N/A        | N/A        | N/A       |
|                                | YES               | N/A        | N/A        | N/A       |
| <b>Bone marrow involvement</b> |                   | 40 (87%)   | 30 (83.3%) | 10 (100%) |
| <b>MIPI Risk Group</b>         | Low               | 5 (10.9%)  | 5 (13.9%)  | 0         |
|                                | Intermediate      | 16 (34.8%) | 15 (41.7%) | 1 (10%)   |
|                                | High              | 25 (54.3%) | 16 (44.4%) | 9 (90%)   |
| <b>MIPI-c Risk Group</b>       | Low               | 5 (10.9%)  | 5 (13.9%)  | 0         |
|                                | Low-Intermediate  | 12 (26.1%) | 12 (33.3%) | 0         |
|                                | Intermediate-High | 23 (50%)   | 19 (52.8%) | 4 (40%)   |
|                                | High              | 6 (13%)    | 0 (0%)     | 6 (60%)   |
|                                | Missing           | -          | -          | -         |
| <b>Ki67 index &gt;30%</b>      |                   | 10 (21.7%) | 4 (11%)    | 6 (60%)   |
| <b>TP53mut</b>                 |                   | 6 (11.8%)  | 0 (0%)     | 6 (60%)   |

**Supplemental Figures**

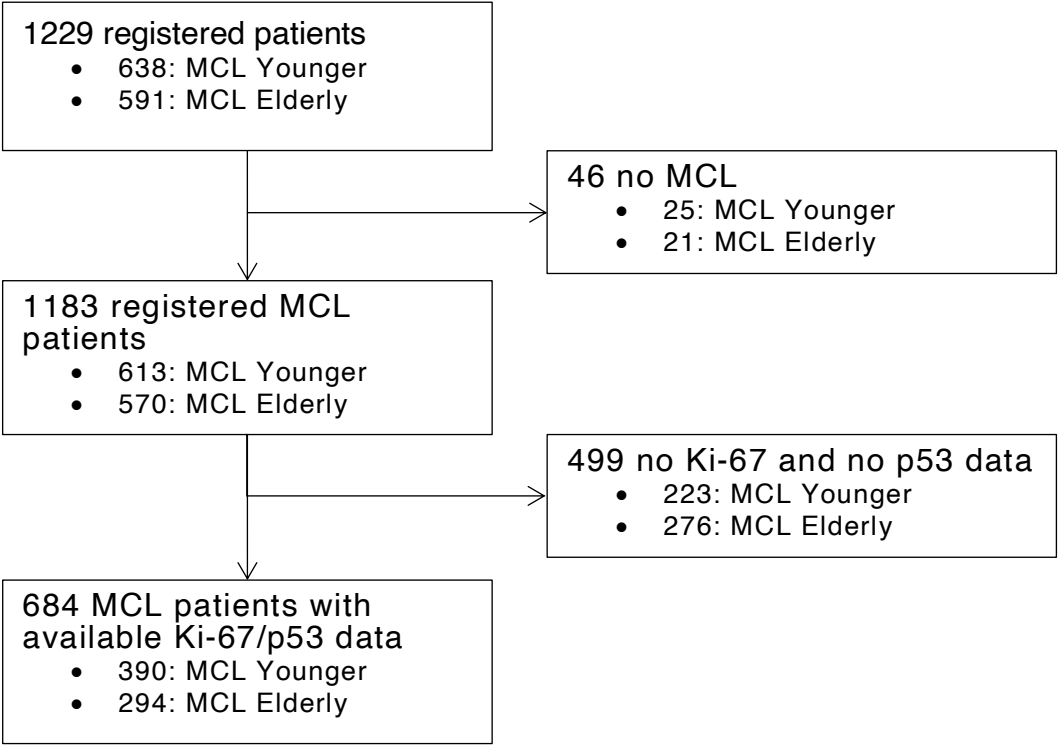

**Supplemental Figure 1: Selection of patients for high-risk disease (HRD) assessment.**

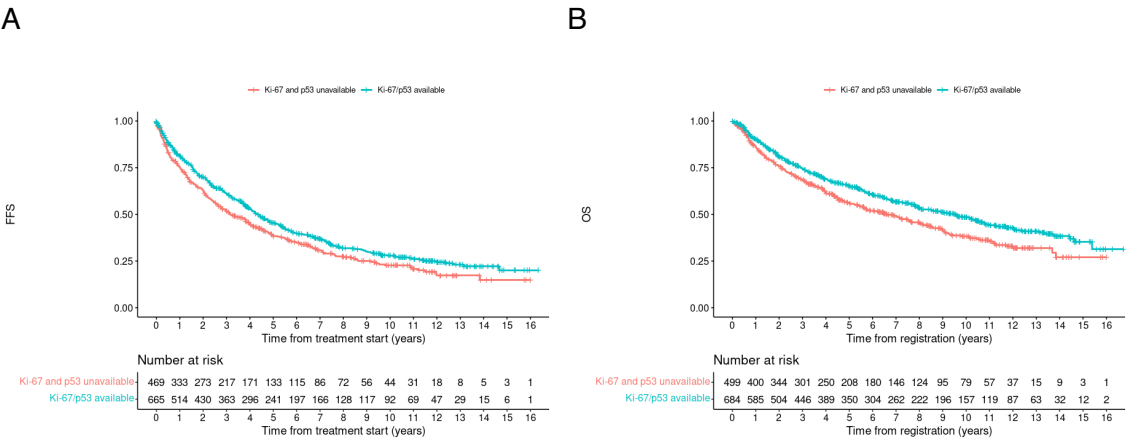

**Supplemental Figure 2: Outcome of patients with available data on Ki-67 or p53 expression compared to those without available data.** Kaplan-Meier estimates of FFS (A) and OS (B) stratified by patients with available data for Ki-67 or p53 compared to patients without available data for Ki-67 and p53.

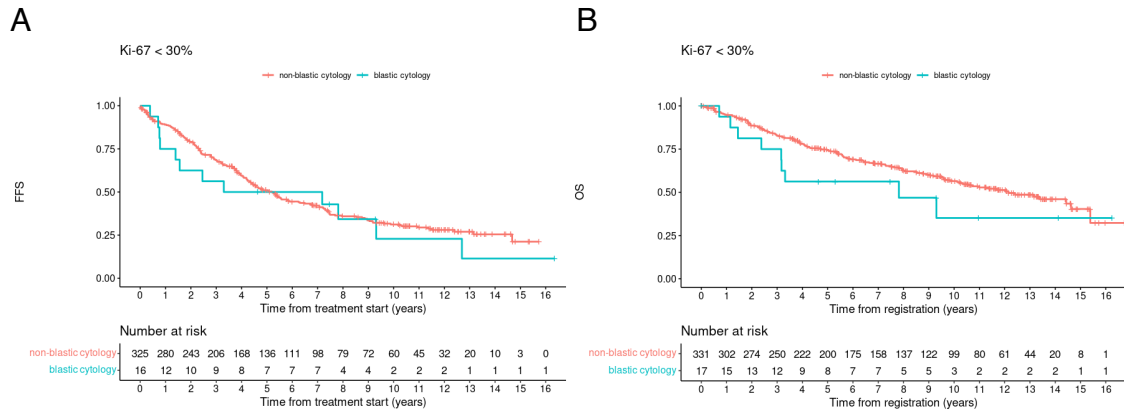

**Supplemental Figure 3: Prognostic impact of MCL cytology in association with low Ki-67.** Kaplan-Meier estimates of FFS (A) and OS (B) stratified by patients with blastoid or non-blastoid cytology adjusted for Ki-67 <30%.

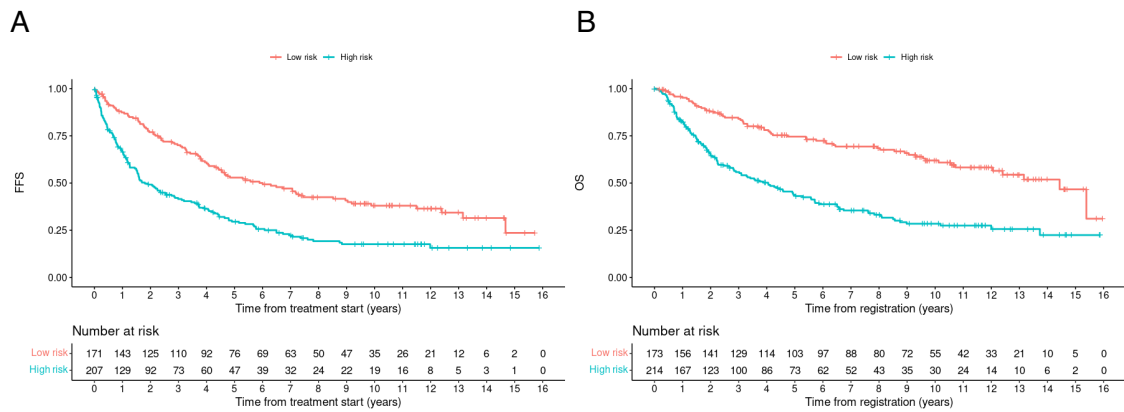

**Supplemental Figure 4: Prognostic impact of high Ki-67 or high p53 expression on clinical outcome.** Kaplan-Meier estimates of FFS (A) and OS (B) of patients with Ki-67  $\geq 30\%$  or p53 expression  $> 50\%$  (high-risk disease) compared to Ki-67  $< 30\%$  and p53 expression  $\leq 50\%$  (low-risk disease).

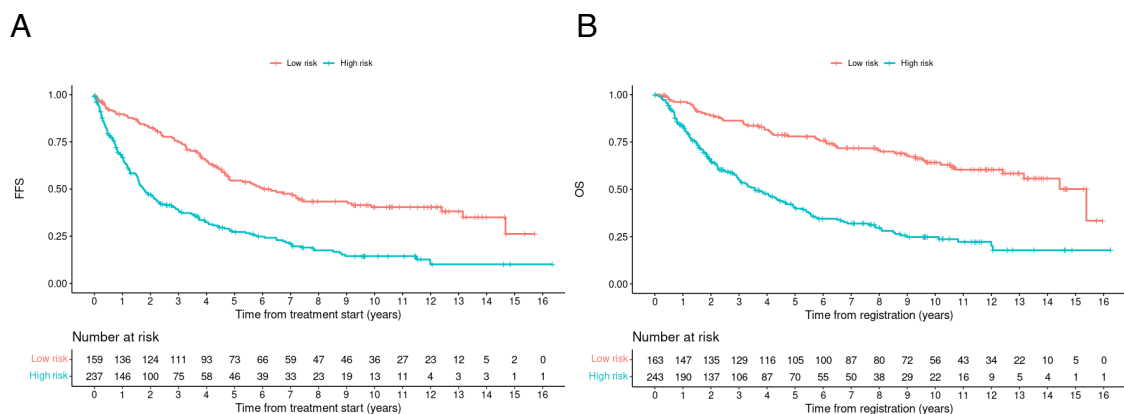

**Supplemental Figure 5: Prognostic impact of high, high intermediate MIPI-c or high p53 expression on clinical outcome.** Kaplan-Meier estimates of FFS (A) and OS (B) of patients

with high, high intermediate MIPI-c or p53 expression >50% (high-risk disease) compared to low or low intermediate MIPI-c and p53 expression  $\leq$ 50% (low-risk disease).
